# Supplementary material
Source: publisher site journal article supplement (https://www.kjim.org/upload/media/kjim-2023-265-Supplementary-Table-6.pdf)
Supplement: Supplementary file 1 [file kjim-2023-265-Supplementary-Table-6.pdf]

**Supplementary Table 6. Comparison of predictive ability of the established geriatric risk model with each risk variable alone or in combination**

| Geriatric variables                                           | C-index |
|---------------------------------------------------------------|---------|
| CCI alone                                                     | 0.5460  |
| Age alone                                                     | 0.5760  |
| ADL alone                                                     | 0.6390  |
| IADL alone                                                    | 0.6555  |
| CCI and age                                                   | 0.5971  |
| ADL and age                                                   | 0.6517  |
| IADL and age                                                  | 0.6591  |
| ADL and CCI                                                   | 0.6636  |
| IADL and CCI                                                  | 0.6692  |
| ADL and IADL                                                  | 0.6792  |
| ADL, CCI, and age                                             | 0.6765  |
| IADL, CCI, and age                                            | 0.6805  |
| ADL, IADL, and age                                            | 0.6908  |
| ADL, IADL, and CCI                                            | 0.6956  |
| Developed geriatric model (including age, ADL, IADL, and CCI) | 0.7060  |

C-index, concordance index; CCI, Charlson's Comorbidity Index; ADL, Activities of Daily Living; IADL, Instrumental Activities of Daily Living.

The C-index provides a measure of discriminative ability of each model. The higher values of C-index denotes the better performance of the model.
